# Supplementary material
Source: publisher figshare collection journal article supplement (https://acs.figshare.com/ndownloader/files/15073757)
Supplement: Supplementary file 1 [file 15073757]

# Supporting Information

## Morphological Evolution of Poly(solketal methacrylate)-*block*-polystyrene Copolymers in Thin Films

Duk Man Yu<sup>†</sup>, Darren M. Smith<sup>‡</sup>, Hyeyoung Kim<sup>†</sup>, Jose Kenneth D. Mapas<sup>‡</sup>, Javid Rzayev<sup>\*,‡</sup>, Thomas P. Russell<sup>\*,†,§,||</sup>

<sup>†</sup>Department of Polymer Science and Engineering, University of Massachusetts Amherst, 120 Governors Drive, Amherst, Massachusetts 01003, United States

<sup>‡</sup>Department of Chemistry, University at Buffalo, The State University of New York, Buffalo, New York 14260-3000, United States

<sup>§</sup>Materials Science Division, Lawrence Berkeley National Laboratory, 1 Cyclotron Road, Berkeley, California 94720, United States

<sup>||</sup>Beijing Advanced Innovation Center for Soft Matter Science and Engineering, Beijing University of Chemical Technology, Beijing 100029, China

### Corresponding Authors

\*E-mail: jrzayev@buffalo.edu, Tel.: (716) 645-4314, Fax: (716) 645-6963

\*E-mail: russell@mail.pse.umass.edu, Tel.: (413) 577-1516, Fax: (413) 577-1510

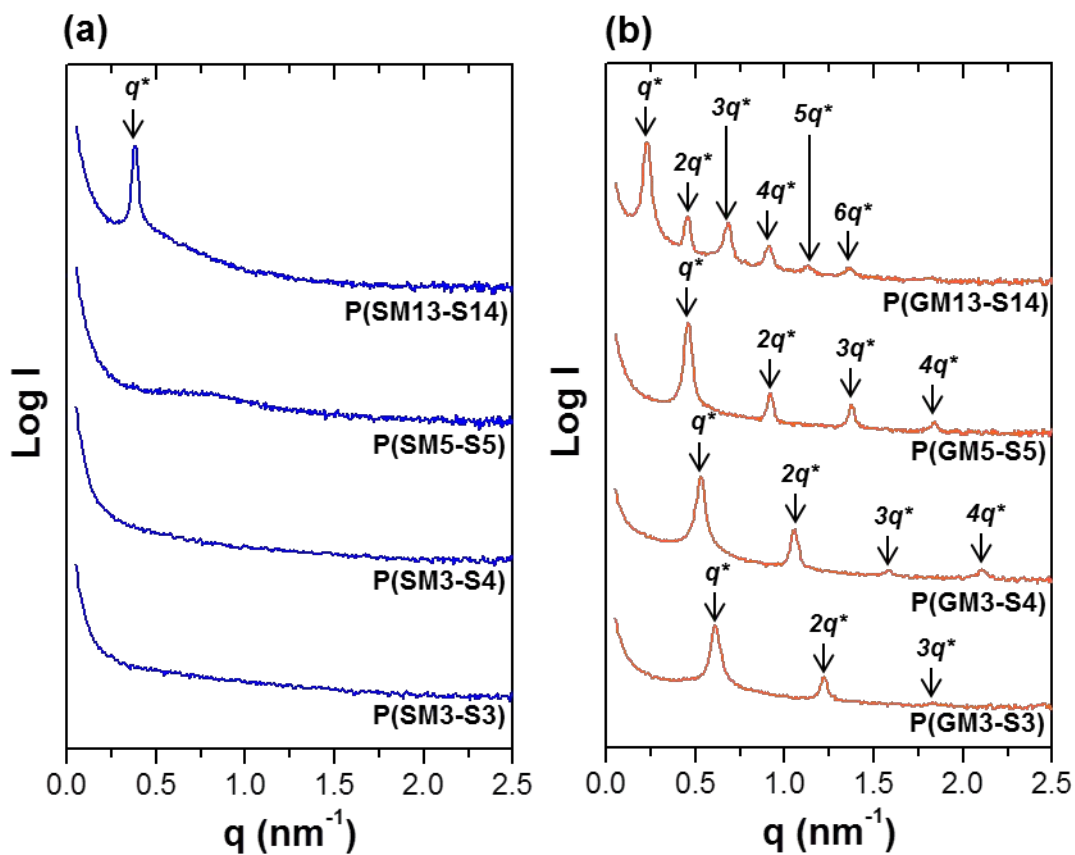

**Figure S1.** SAXS absolute intensity profiles for PSM-*b*-PS copolymers in bulk as a function of the scattering vector ( $q$ ) (a) before and (b) after acid hydrolysis reaction.<sup>1</sup> The samples were thermally annealed at 140 °C for 24 h, and then measured at room temperature for 10 min. The arrows indicate the position of the primary ( $q^*$ ) and higher order reflections, and the intensity profiles are vertically shifted for clarity.

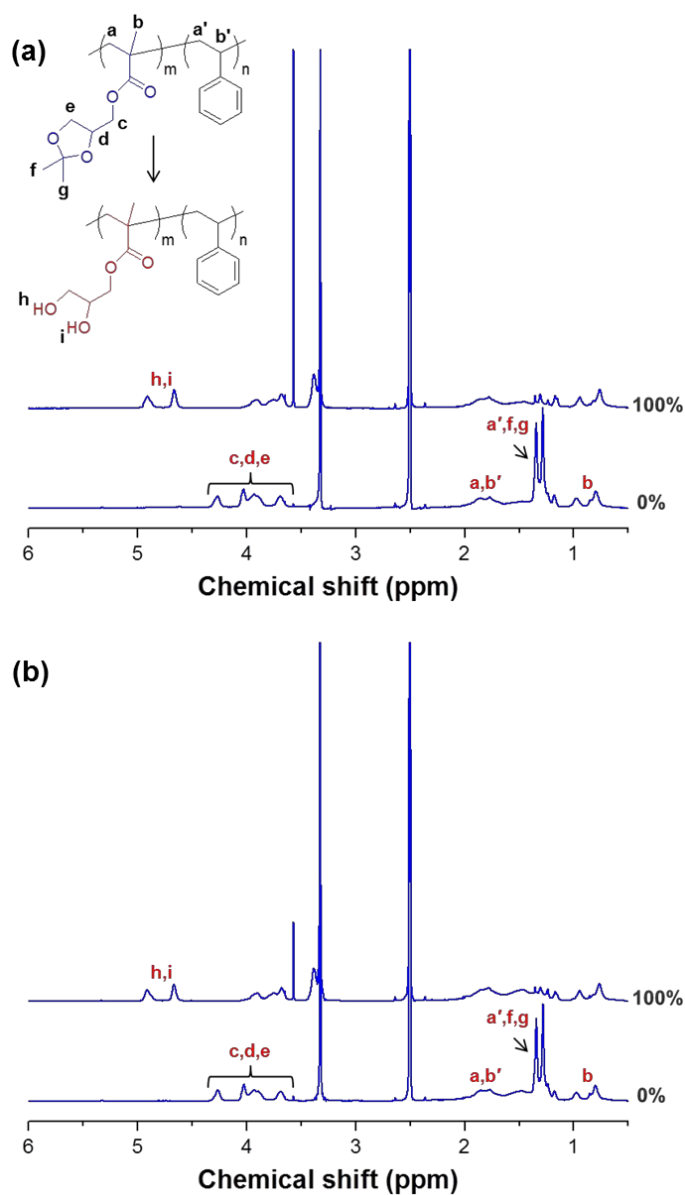

**Figure S2.**  $^1\text{H}$  NMR spectra in  $\text{DMSO}-d_6$  of (a) P(SM3-S4) and (b) P(SM3-S3) before and after acid hydrolysis reaction. The conversion was confirmed by the ratio of the peak areas between the methyl group of the backbone ( $b$ ; 0.65–1.05 ppm) in SM segments and the hydroxy group ( $h, i$ ; 4.55–4.96 ppm) in GM segments. The spectrums are vertically shifted for clarity.

**Table S1.** Contact angles of water and methylene iodide (MI) and surface energies of PSM, PGM, PSM-*r*-PS, and PGM-*r*-PS measured in air. The contact angles were measured at room temperature and the surface energies were calculated using Wu's method.<sup>2,3</sup>

| Surface           | Water contact angle (°) | MI contact angle (°) | $\gamma^d$ (mJ/m <sup>2</sup> ) <sup>b</sup> | $\gamma^p$ (mJ/m <sup>2</sup> ) <sup>c</sup> | $\gamma$ (mJ/m <sup>2</sup> ) |
|-------------------|-------------------------|----------------------|----------------------------------------------|----------------------------------------------|-------------------------------|
| PS <sup>a</sup>   | -                       | -                    | 33.9                                         | 6.8                                          | 40.7                          |
| PSM               | 72.2 ± 0.5              | 42.9 ± 0.3           | 29.4                                         | 14.3                                         | 43.7                          |
| PGM               | 58.1 ± 1.1              | 33.1 ± 0.4           | 31.9                                         | 20.9                                         | 52.8                          |
| PSM- <i>r</i> -PS | 78.0 ± 0.4              | 37.3 ± 0.4           | 32.9                                         | 10.6                                         | 43.5                          |
| PGM- <i>r</i> -PS | 66.8 ± 0.4              | 36.9 ± 0.6           | 31.4                                         | 16.1                                         | 47.5                          |

<sup>a</sup>Obtained from the reference.<sup>2</sup> <sup>b</sup>Dispersion element. <sup>c</sup>Polar element.

**Table S2.** Interfacial energies of PS, PSM, and PGM with the random copolymer brush layer.

| Surface           | Interfacial energy with PS (mJ/m <sup>2</sup> ) | Interfacial energy with PSM or PGM (mJ/m <sup>2</sup> ) | $\Delta\gamma$ (mJ/m <sup>2</sup> ) |
|-------------------|-------------------------------------------------|---------------------------------------------------------|-------------------------------------|
| PSM- <i>r</i> -PS | 0.8                                             | 0.7 with PSM                                            | 0.1                                 |
| PGM- <i>r</i> -PS | 3.9                                             | 0.6 with PGM                                            | 3.3                                 |

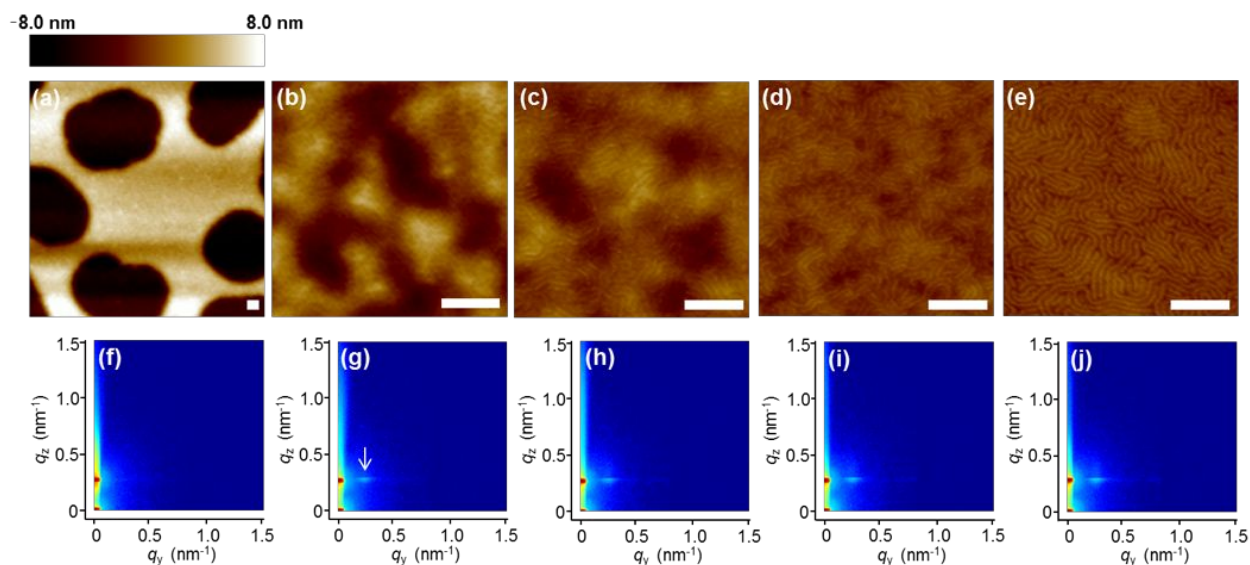

**Figure S3.** Morphological evolution of P(SM13-S14) ( $N = 197$ ) in the thin films as a function of exposure time ranging from 0 min to 80 min to TFA vapor; (a,f) 0 min, (b,g) 20 min, (c,h) 40 min, (d,i) 60 min, and (e,j) 80 min. The samples were thermally annealed at 150 °C for 12 h, and then measured by (a–e) AFM height and (f–j) GISAXS. The color contrast is shown in the AFM height images; dark area is thinner (holes) and bright area is thicker (islands). The two dimensional (2D) GISAXS measurement was performed at room temperature for 10 min, and the incident angle ( $\alpha_i$ ) was set at  $0.18^\circ$ , which is larger than the critical angle of the polymer film ( $0.16^\circ$ ). The scale bars represent 250 nm.

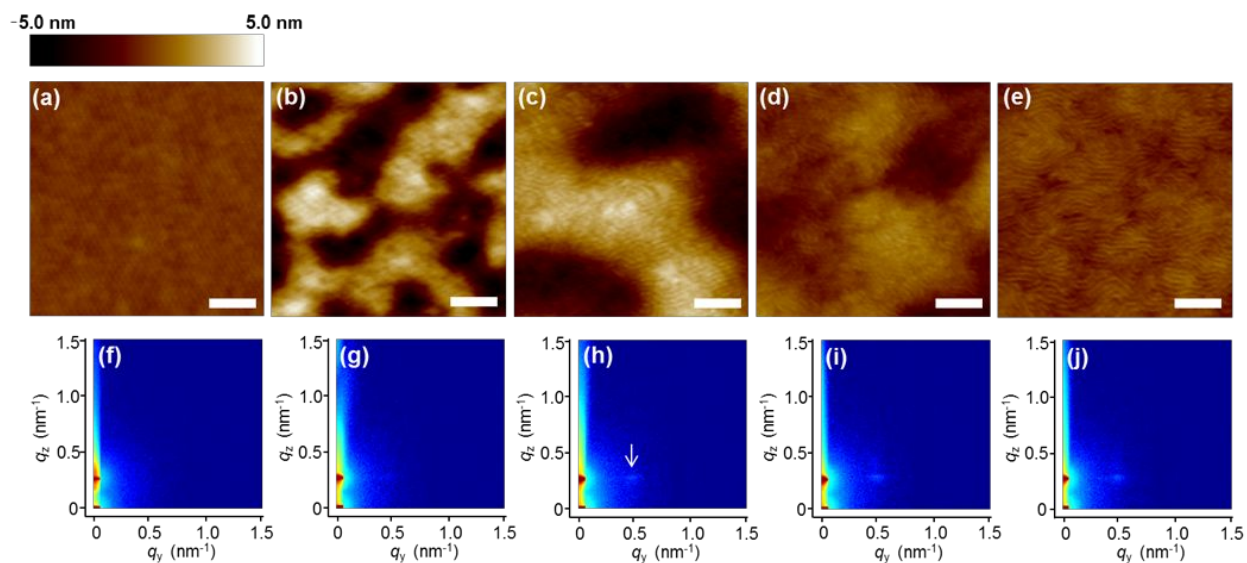

**Figure S4.** Morphological evolution of P(SM5-S5) ( $N = 76$ ) in the thin films as a function of exposure time ranging from 0 min to 80 min to TFA vapor; (a,f) 0 min, (b,g) 20 min, (c,h) 40 min, (d,i) 60 min, and (e,j) 80 min. The samples were thermally annealed at 150 °C for 12 h, and then measured by (a–e) AFM height and (f–j) GISAXS. The color contrast is shown in the AFM height images; dark area is thinner (holes) and bright area is thicker (islands). The 2D GISAXS measurement was performed at room temperature for 10 min, and  $\alpha_i$  was set at 0.18°. The scale bars represent 100 nm.

## REFERENCES

- [1] Yu, D. M.; Mapas, J. K. D.; Kim, H.; Choi, J.; Ribbe, A. E.; Rzaev, J.; Russell, T. P. Evaluation of the Interaction Parameter for Poly(solketal methacrylate)-*block*-polystyrene Copolymers. *Macromolecules* **2018**, 51, 1031-1040.
- [2] Wu, S. Calculation of Interfacial Tension in Polymer Systems. *J. Polym. Sci., Part C: Polym. Symp.* **1971**, 34, 19-30.
- [3] Thomas, S.; Thomas, S.; Abraham, R.; Bandyopadhyay, S. Polystyrene/Calcium Phosphate Nanocomposites: Contact Angle Studies Based on Water and Methylene Iodide. *Express Polym Lett* **2008**, 2, 528-538.
